# Supplementary material for: A crystallographic approach to the short-range ordering problem in V1−xMoxO2 (0.50 ≤ x ≤ 0.60)
Source: Royal Society of Chemistry journal article supplement (doi:10.1039/d0tc01173h), 2020-01-01
Supplement: d0tc01173h1.pdf [file d0tc01173h1.pdf]

# A crystallographic approach to the short-range ordering problem in $V_{1-x}Mo_xO_2$ ( $0.50 \leq x \leq 0.60$ )

Matthew A. Davenport<sup>a</sup> and Jared M. Allred<sup>a, †</sup>

<sup>a</sup> Department of Chemistry and Biochemistry, The University of Alabama, Tuscaloosa, AL 35487, USA.

† jmallred@ua.edu.

DOI: 10.1039/x0xx00000x

## Electronic Supplemental Information

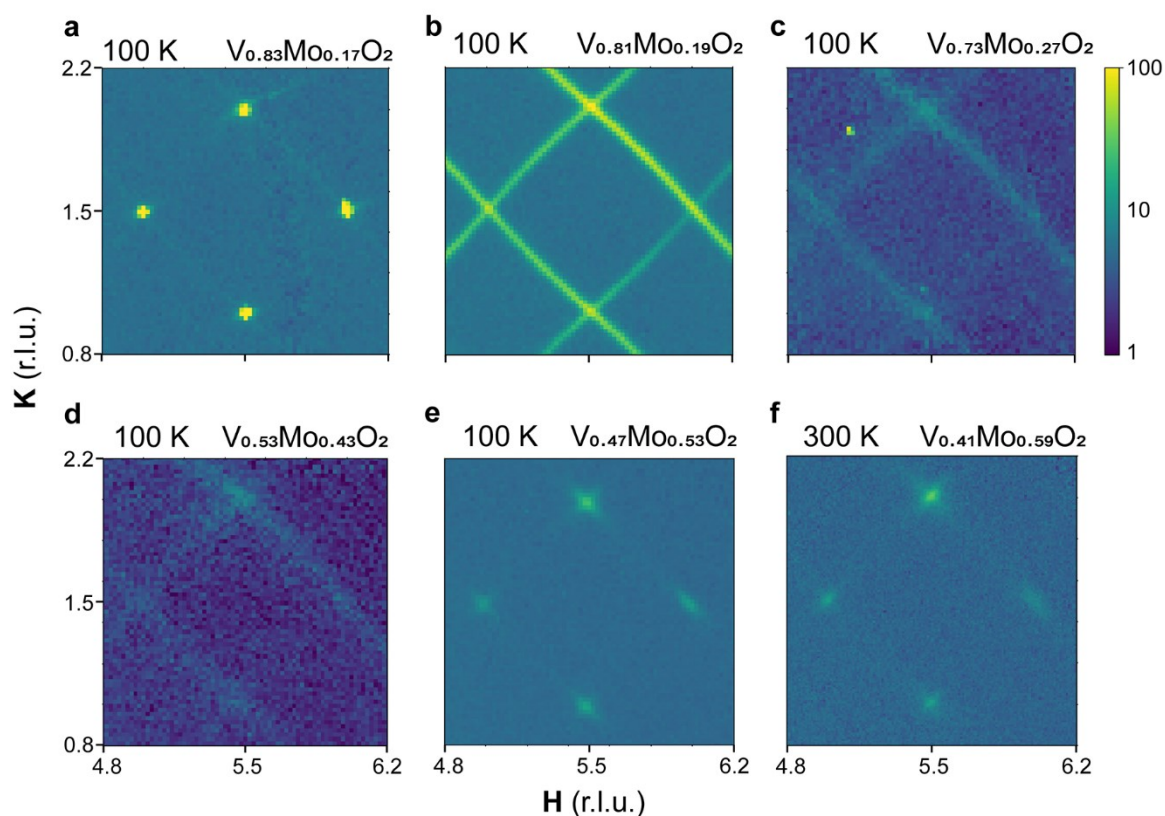

Figure S1: Detail views from reciprocal space maps of different Mo compositions from 6-ID-D, showing the gradual evolution of the scattering in the low-temperature phases in  $V_{1-x}Mo_xO_2$ . **a** M1;  $x \leq 0.17$ . **b-d** 2D-M2;  $0.19 \leq x \leq 0.43$ . **e-f** The short-range ordered studied here;  $0.5 \leq x \leq 0.6$ .

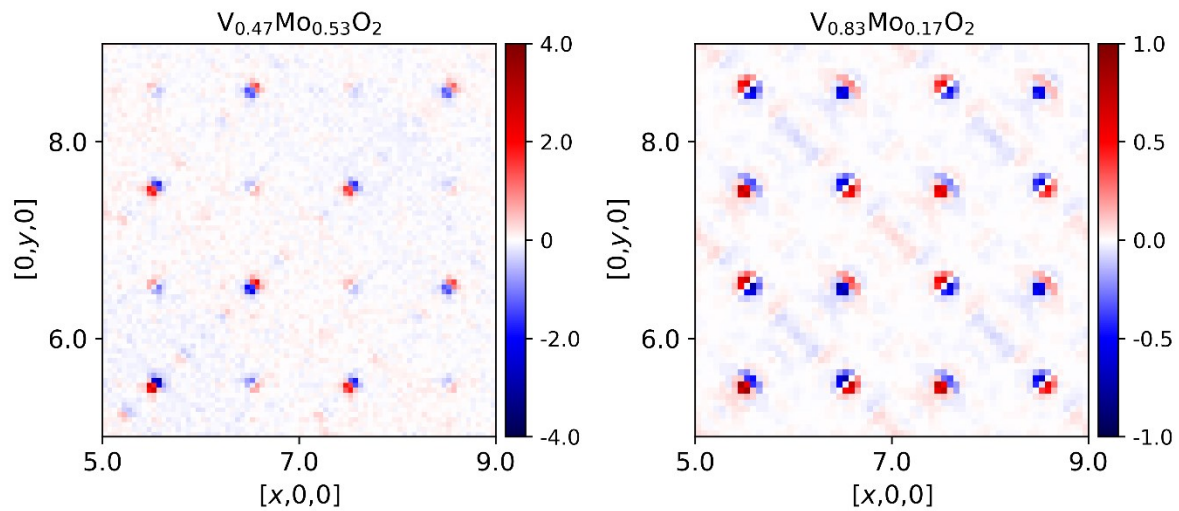

Figure S2: Detail views from  $\Delta$ PDF in low-temperature  $V_{1-x}Mo_xO_2$  phases. **a** 100 K  $x = 0.53$ . **b** M1; 115 K  $x = 0.17$ . Slices are same as in main text,  $0.333 \leq z \leq 0.5$ .
